# Supplementary material
Source: PubMed Central journal article supplement (PMC3024466)

## **Supplemental Material for**

# **CD22 is a recycling receptor that can shuttle cargo between the cell surface and endosomal compartments of B cells**

Mary K. O'Reilly, Hua Tian and James C. Paulson

From: the Department of Chemical Physiology, The Scripps Research Institute,  
La Jolla, CA, 92037

## **Materials and Methods**

### **Stability of disulfide-linked biotin**

BJAB cell surface proteins were biotinylated as described for the internalization and recycling experiments. After washing away unreacted biotinylation reagent with 25 mM lysine, cells were warmed to 37 °C in RPMI/10%FBS/50 $\mu$ M 2-ME for 90 minutes to mimic the conditions of the internalization/recycling experiments. Cells were then washed twice with cold DPBS, and lysed and immunoprecipitated with streptavidin-agarose resin as described in the main text.

**Supplemental Fig. 1. Evidence for recycling is not seen for the isotype control of  $\alpha$ CD22 (Figure 2) or for  $\alpha$ NP Anti-mouse IgG (a) or  $\alpha$ NP IgM and  $^{BPC}$ NeuAc-NP (b) were used in place of anti-CD22 as controls for the antibody recycling experiment Figure 2. Following the same protocol, neutral and acid-washed cells were stained with a labeled secondary antibody (a). Thick lines represent neutral-washed cells, thin lines represent acid-washed cells, and filled curves represent control in the absence of antibody. Acid-washed cells from the first step were warmed again to allow antibody to be recycled back to the cell surface. Following this 37° C incubation, neutral and acid-washed cells were stained with secondary antibody (b). As a control, acid-washed cells were incubated at 4° C instead of 37° C in the second step (c).**

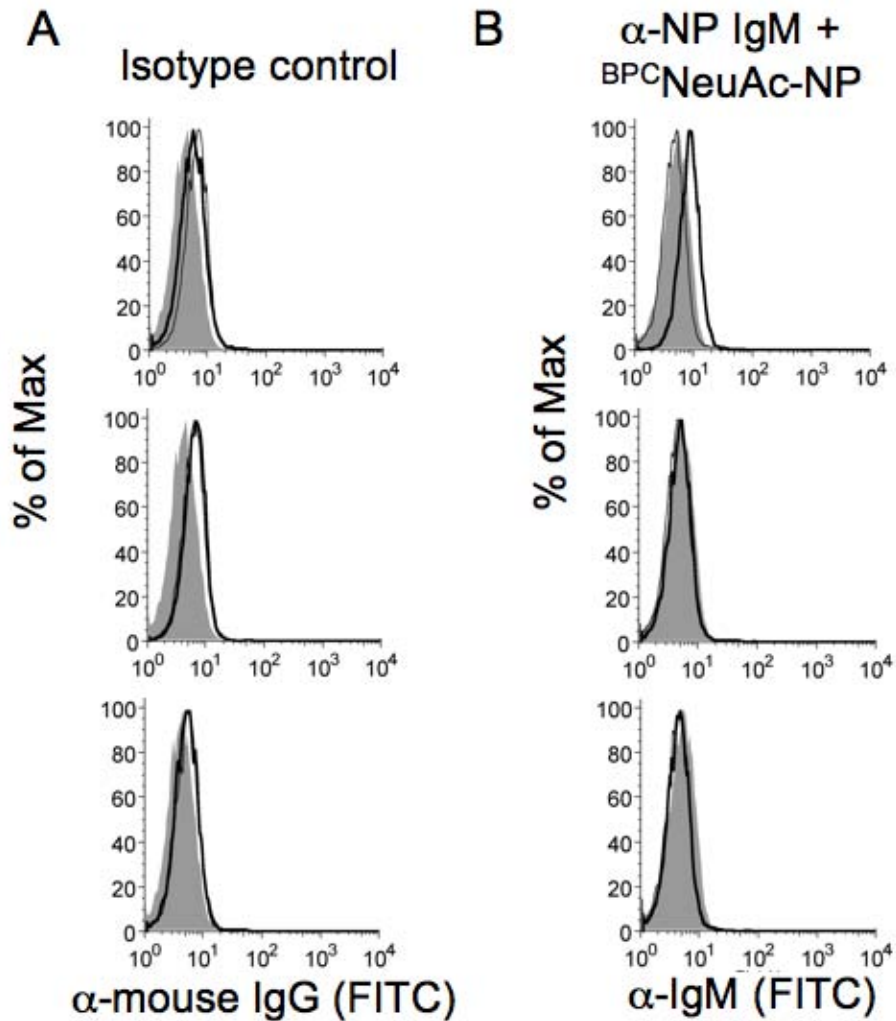

**Supplemental Fig. 2.  $\alpha$ CD22 uptake by alanine and aspartate mutants of Y843 and Y863.** Murine B cell transfectants of single and double CD22 mutations from tyrosine 843 and 863 to alanine (a) or aspartate (b) were tested for internalization of fluorescently labeled  $\alpha$ CD22 antibody. Cells were incubated at 4 ° C with antibody and then washed (thin line) or not washed (dotted line) prior to the 37 ° C incubation. Cells that were not washed prior to 37° C incubation were also acid-washed following the warming step to reveal internalized antibody (thick line). Cells that were acid-washed following the 4 ° C incubation were included as control (filled curve).

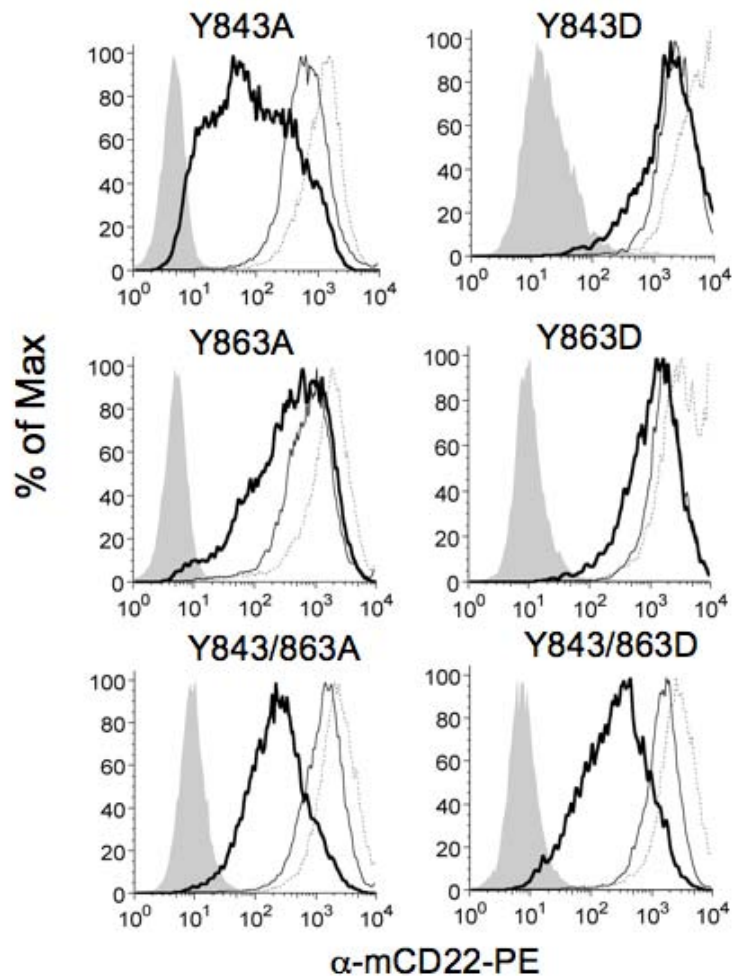

**Supplemental Fig. 3. Disulfide-linked biotin is stable to endosomal conditions.** Biotinylated BJAB cells were warmed to 37 °C for 90 minutes to mimic endocytosis and recycling experimental conditions in order to determine whether the biotin is lost to reduction upon internalization. Streptavidin pull-down and probing for CD22 by western blot reveals no loss in the biotin label from CD22.

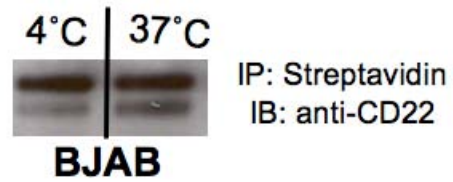

**Supporting Figure S4.  $\alpha$ NP and  $^{BPC}$ NeuAc-NP do not accelerate the constitutive rate of CD22 endocytosis.** Steps A-C from Figure 3 were carried out to measure endocytosis of CD22 in BJAB cells. Samples from the last three lanes included 40  $\mu$ g/mL  $\alpha$ NP IgM and 2  $\mu$ M  $^{BPC}$ NeuAc-NP in the warming/internalization step.

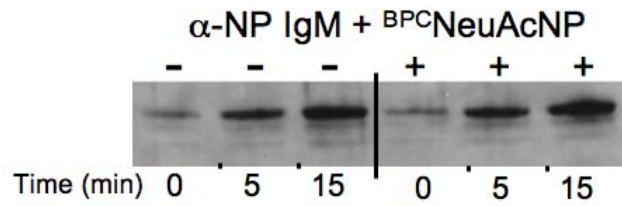

Supplement: NIHMS259229-supplement-supplementary.pdf [file NIHMS259229-supplement-supplementary.pdf]
